# Supplementary material for: Comparison of computational approaches for identification and quantification of urinary metabolites in 1H NMR spectra
Source: Royal Society of Chemistry journal article supplement (doi:10.1039/c8ay00830b), 2018-01-01
Supplement: c8ay00830b1.zip [file c8ay00830b1.zip]

## Sheet: Raw data
	1,3-Dimethylurate	1,6-Anhydro-β-D-glucose	1,7-Dimethylxanthine	1-Methylnicotinamide	2-Aminoadipate	2-Aminobutyrate	2-Furoylglycine	2-Hydroxyisobutyrate	2-Hydroxyphenylacetate	2-Oxoglutarate	3-Aminoisobutyrate	3-Hydroxy-3-methylglutarate	3-Hydroxybutyrate	3-Hydroxyisobutyrate	3-Hydroxyisovalerate	3-Hydroxymandelate	3-Hydroxyphenylacetate	3-Indoxylsulfate	4-Aminohippurate	4-Hydroxy-3-methoxymandelate	4-Hydroxybenzoate	4-Hydroxyphenylacetate	4-Hydroxyphenyllactate	5-Aminolevulinate	5-Hydroxytryptophan	6-Hydroxynicotinate	Acetaminophen	Acetate	Acetoacetate	Acetone	Adipate	Alanine	Anserine	Arginine	Ascorbate	Asparagine	ATP	Azelate	Betaine	Butanone	Caffeine	Carnitine	Carnosine	Chlorogenate	Choline	cis-Aconitate	Citrate	Creatine	Creatinine
Chenomx	0.034	0.134	NaN	0.0863	NaN	0.023	NaN	0.0737	NaN	0.1216	0.1272	NaN	NaN	0.1363	0.0963	NaN	0.0315	0.2356	NaN	0.0294	0.0851	0.1019	NaN	NaN	NaN	NaN	NaN	0.0682	NaN	0.0178	0.0193	0.2988	NaN	NaN	NaN	0.0935	0.0215	NaN	0.0879	NaN	0.0245	0.2252	NaN	NaN	0.0346	0.2623	1.8215	0.8088	16.7164
Chenomx	0.0244	0.128	NaN	0.0835	NaN	0.0158	NaN	0.0722	NaN	0.1024	0.1063	NaN	NaN	0.1345	0.0897	NaN	0.024	0.2447	NaN	0.0267	0.0815	0.1203	NaN	NaN	NaN	NaN	NaN	0.0677	NaN	0.0154	NaN	0.3036	NaN	NaN	NaN	0.0813	0.0179	NaN	0.0918	NaN	0.0388	0.2553	NaN	NaN	0.0204	0.2441	1.7521	0.8088	16.615
Chenomx	0.0271	0.1245	NaN	0.0846	NaN	0.0143	NaN	0.0747	NaN	0.1118	0.1143	NaN	NaN	0.1346	0.09	NaN	0.0178	0.2059	NaN	0.0285	0.079	0.1151	NaN	NaN	NaN	NaN	NaN	0.0582	NaN	0.0167	0.0114	0.3035	NaN	NaN	NaN	0.0879	0.0209	NaN	0.0865	NaN	0.0421	0.2556	NaN	NaN	0.0195	0.2682	1.808	0.7875	16.7307
Chenomx	0.0239	0.1067	NaN	0.085	NaN	0.0155	NaN	0.0751	NaN	0.1082	0.1137	NaN	NaN	0.1343	0.0903	NaN	0.0181	0.2155	NaN	0.023	0.0845	0.1124	NaN	NaN	NaN	NaN	NaN	0.0637	NaN	0.015	NaN	0.3027	NaN	NaN	NaN	0.0779	0.0182	NaN	0.0868	NaN	0.0369	0.2563	NaN	NaN	0.0239	0.2643	1.8101	0.7762	16.6772
Chenomx	0.0331	0.1297	NaN	0.0865	NaN	0.0167	NaN	0.0761	NaN	0.1066	0.1142	NaN	NaN	0.1346	0.09	NaN	0.0189	0.2501	NaN	0.0277	0.081	0.117	NaN	NaN	NaN	NaN	NaN	0.0594	NaN	0.0163	NaN	0.3019	NaN	NaN	NaN	0.0932	0.0197	NaN	0.079	NaN	0.0395	0.2304	NaN	NaN	0.0176	0.2662	1.822	0.7807	16.6551
Chenomx	0.0206	0.1345	NaN	0.0823	NaN	0.0157	NaN	0.0741	NaN	0.1177	0.1161	NaN	NaN	0.1337	0.0946	NaN	0.0225	0.251	NaN	0.0242	0.0807	0.1129	NaN	NaN	NaN	NaN	NaN	0.0645	NaN	0.0163	NaN	0.3032	NaN	NaN	NaN	0.0719	0.0244	NaN	0.0824	NaN	0.0375	0.2504	NaN	NaN	0.0204	0.2537	1.7787	0.8001	16.6728
Chenomx	0.0264	0.1172	NaN	0.0844	NaN	0.0162	NaN	0.0763	NaN	0.1227	0.1138	NaN	NaN	0.1352	0.0901	NaN	0.0183	0.2427	NaN	0.0236	0.0795	0.11	NaN	NaN	NaN	NaN	NaN	0.0626	NaN	0.015	NaN	0.3218	NaN	NaN	NaN	0.0863	0.0234	NaN	0.0914	NaN	0.0414	0.2315	NaN	NaN	0.0122	0.2451	1.8057	0.7879	16.7079
Chenomx	0.026	0.1268	NaN	0.0837	NaN	0.0123	NaN	0.0744	NaN	0.1104	0.1205	NaN	NaN	0.1352	0.0929	NaN	0.021	0.2517	NaN	0.0296	0.083	0.1074	NaN	NaN	NaN	NaN	NaN	0.0662	NaN	0.0156	NaN	0.3036	NaN	NaN	NaN	0.0788	0.0168	NaN	0.085	NaN	0.0341	0.2504	NaN	NaN	0.0235	0.2154	1.7183	0.7794	16.6704
Chenomx	0.0341	0.1327	NaN	0.084	NaN	0.0152	NaN	0.0724	NaN	0.105	0.1164	NaN	NaN	0.1331	0.0889	NaN	0.0216	0.2534	NaN	0.028	0.081	0.1259	NaN	NaN	NaN	NaN	NaN	0.0691	NaN	0.0159	NaN	0.2992	NaN	NaN	NaN	0.0881	0.0191	NaN	0.0889	NaN	0.0343	0.2594	NaN	NaN	0.0192	0.1739	1.7742	0.7974	16.6232
Chenomx	0.0263	0.121	NaN	0.0822	NaN	0.0153	NaN	0.0727	NaN	0.0938	0.1181	NaN	NaN	0.134	0.0901	NaN	0.0222	0.2511	NaN	0.0302	0.0837	0.1214	NaN	NaN	NaN	NaN	NaN	0.0699	NaN	0.0211	NaN	0.302	NaN	NaN	NaN	0.0777	0.0216	NaN	0.0911	NaN	0.0196	0.253	NaN	NaN	0.0217	0.209	1.6978	0.8271	16.6911
Chenomx	0.0257	0.0828	NaN	0.0848	NaN	0.0148	NaN	0.0757	NaN	0.1059	0.1161	NaN	NaN	0.1342	0.0918	NaN	0.0205	0.2476	NaN	0.0287	0.0933	0.1003	NaN	NaN	NaN	NaN	NaN	0.0735	NaN	0.0133	NaN	0.3042	NaN	NaN	NaN	0.0767	0.02	NaN	0.0887	NaN	0.0134	0.251	NaN	NaN	0.0251	0.1988	1.7574	0.8072	16.6269
Chenomx	0.031	0.1265	NaN	0.088	NaN	0.0143	NaN	0.0746	NaN	0.1064	0.1164	NaN	NaN	0.133	0.0904	NaN	0.018	0.2373	NaN	0.0278	0.0777	0.1283	NaN	NaN	NaN	NaN	NaN	0.0582	NaN	0.0165	NaN	0.3009	NaN	NaN	NaN	0.0691	0.0224	NaN	0.0754	NaN	0.0147	0.2553	NaN	NaN	0.0147	0.2459	1.8078	0.786	16.7166
Chenomx	0.0254	0.1081	NaN	0.0789	NaN	0.0161	NaN	0.0769	NaN	0.1226	0.112	NaN	NaN	0.1344	0.0903	NaN	0.0194	0.2054	NaN	0.0221	0.0809	0.1118	NaN	NaN	NaN	NaN	NaN	0.0616	NaN	0.0136	NaN	0.3048	NaN	NaN	NaN	0.0864	0.0179	NaN	0.1024	NaN	0.0152	0.2596	NaN	NaN	0.0153	0.2382	1.8146	0.8047	16.7193
Chenomx	0.0238	0.1182	NaN	0.0821	NaN	0.015	NaN	0.0743	NaN	0.098	0.1021	NaN	NaN	0.1336	0.0901	NaN	0.0198	0.2268	NaN	0.0254	0.0773	0.1112	NaN	NaN	NaN	NaN	NaN	0.057	NaN	0.0142	NaN	0.3001	NaN	NaN	NaN	0.0852	0.0187	NaN	0.0721	NaN	0.0219	0.2609	NaN	NaN	0.0129	0.2245	1.7546	0.717	16.6028
Chenomx	0.0208	0.1272	NaN	0.0873	NaN	0.0129	NaN	0.075	NaN	0.1253	0.1161	NaN	NaN	0.134	0.0948	NaN	0.0202	0.2193	NaN	0.0354	0.0776	0.1188	NaN	NaN	NaN	NaN	NaN	0.0595	NaN	0.015	NaN	0.3016	NaN	NaN	NaN	0.0718	0.0199	NaN	0.0873	NaN	0.0145	0.2525	NaN	NaN	0.0219	0.245	1.7992	0.7612	16.6709
Chenomx	0.028	0.1222	NaN	0.0841	NaN	0.0147	NaN	0.0762	NaN	0.1257	0.1164	NaN	NaN	0.1362	0.0896	NaN	0.024	0.2501	NaN	0.0353	0.096	0.1184	NaN	NaN	NaN	NaN	NaN	0.0648	NaN	0.0127	NaN	0.3036	NaN	NaN	NaN	0.0759	0.0201	NaN	0.1023	NaN	0.017	0.2573	NaN	NaN	0.0183	0.2488	1.6511	0.7849	16.7255
Chenomx	0.0247	0.0914	NaN	0.0838	NaN	0.0164	NaN	0.076	NaN	0.124	0.1167	NaN	NaN	0.1343	0.09	NaN	0.0172	0.2502	NaN	0.0241	0.0842	0.1141	NaN	NaN	NaN	NaN	NaN	0.065	NaN	0.0159	NaN	0.3055	NaN	NaN	NaN	0.0872	0.0244	NaN	0.0932	NaN	0.0174	0.2574	NaN	NaN	0.0154	0.2623	1.7008	0.8251	16.7267
Chenomx	0.0254	0.1251	NaN	0.0837	NaN	0.014	NaN	0.0764	NaN	0.108	0.1143	NaN	NaN	0.135	0.0896	NaN	0.0203	0.2412	NaN	0.0289	0.0788	0.1167	NaN	NaN	NaN	NaN	NaN	0.067	NaN	0.0137	NaN	0.3016	NaN	NaN	NaN	0.0712	0.0205	NaN	0.0795	NaN	0.0126	0.2566	NaN	NaN	0.0223	0.2713	1.7992	0.7693	16.6478
Chenomx	0.0227	0.1132	NaN	0.0844	NaN	0.0133	NaN	0.0762	NaN	0.0907	0.1154	NaN	NaN	0.1361	0.0901	NaN	0.0181	0.2499	NaN	0.0283	0.0848	0.1125	NaN	NaN	NaN	NaN	NaN	0.0667	NaN	0.0161	NaN	0.2958	NaN	NaN	NaN	0.0868	0.0209	NaN	0.0913	NaN	0.0169	0.258	NaN	NaN	0.022	0.2108	1.7938	0.7904	16.747
Chenomx	0.0197	0.1204	NaN	0.0858	NaN	0.0111	NaN	0.0733	NaN	0.1075	0.1017	NaN	NaN	0.1304	0.0859	NaN	0.0199	0.237	NaN	0.0294	0.0755	0.1133	NaN	NaN	NaN	NaN	NaN	0.0548	NaN	0.0134	NaN	0.2947	NaN	NaN	NaN	0.0595	0.0196	NaN	0.0772	NaN	0.0143	0.2397	NaN	NaN	0.0141	0.2271	1.6929	0.6605	15.5493
Chenomx	0.0159	0.1191	NaN	0.0773	NaN	0.0149	NaN	0.0749	NaN	0.1219	0.1008	NaN	NaN	0.1342	0.0908	NaN	0.0198	0.2515	NaN	0.0287	0.0788	0.1138	NaN	NaN	NaN	NaN	NaN	0.0546	NaN	0.0144	NaN	0.3134	NaN	NaN	NaN	0.0848	0.0223	NaN	0.0782	NaN	0.0138	0.2548	NaN	NaN	0.0167	0.2651	1.6585	0.7698	16.6863
Chenomx	0.0162	0.114	NaN	0.0807	NaN	0.015	NaN	0.0754	NaN	0.116	0.1148	NaN	NaN	0.1343	0.0899	NaN	0.0187	0.2441	NaN	0.0297	0.0825	0.1269	NaN	NaN	NaN	NaN	NaN	0.0613	NaN	0.0147	NaN	0.3026	NaN	NaN	NaN	0.0729	0.0189	NaN	0.0889	NaN	0.0145	0.2535	NaN	NaN	0.0187	0.2476	1.8008	0.7647	16.6702
Chenomx	0.0263	0.1073	NaN	0.0807	NaN	0.0151	NaN	0.0753	NaN	0.1082	0.0929	NaN	NaN	0.1332	0.0904	NaN	0.018	0.2494	NaN	0.032	0.0772	0.1203	NaN	NaN	NaN	NaN	NaN	0.0533	NaN	0.0142	NaN	0.3008	NaN	NaN	NaN	0.0826	0.0213	NaN	0.0844	NaN	0.0146	0.2593	NaN	NaN	0.0191	0.232	1.8276	0.654	16.6936
Chenomx	0.0281	0.105	NaN	0.0848	NaN	0.0152	NaN	0.0776	NaN	0.1208	0.1152	NaN	NaN	0.1346	0.0902	NaN	0.0195	0.236	NaN	0.0319	0.0917	0.1261	NaN	NaN	NaN	NaN	NaN	0.0665	NaN	0.0151	NaN	0.3042	NaN	NaN	NaN	0.0689	0.0211	NaN	0.0891	NaN	0.0141	0.2549	NaN	NaN	0.0209	0.2684	1.8139	0.7937	16.7193
Chenomx	0.0233	0.1141	NaN	0.0818	NaN	0.0166	NaN	0.0755	NaN	0.128	0.1139	NaN	NaN	0.1346	0.0897	NaN	0.0215	0.2536	NaN	0.023	0.0804	0.133	NaN	NaN	NaN	NaN	NaN	0.0628	NaN	0.0153	NaN	0.3033	NaN	NaN	NaN	0.0808	0.0196	NaN	0.0925	NaN	0.0192	0.2551	NaN	NaN	0.0176	0.2786	1.7762	0.7792	16.6934
Chenomx	0.0282	0.1194	NaN	0.0849	NaN	0.0143	NaN	0.0757	NaN	0.1026	0.1038	NaN	NaN	0.1327	0.0928	NaN	0.0201	0.2494	NaN	0.0294	0.0859	0.1142	NaN	NaN	NaN	NaN	NaN	0.0623	NaN	0.0156	NaN	0.3015	NaN	NaN	NaN	0.0789	0.0195	NaN	0.0876	NaN	0.0155	0.2556	NaN	NaN	0.0202	0.2381	1.8101	0.7196	16.6225
Chenomx	0.0248	0.1127	NaN	0.0809	NaN	0.0151	NaN	0.0766	NaN	0.1269	0.1116	NaN	NaN	0.133	0.089	NaN	0.0195	0.2159	NaN	0.0271	0.0811	0.1254	NaN	NaN	NaN	NaN	NaN	0.0609	NaN	0.0153	NaN	0.3048	NaN	NaN	NaN	0.0806	0.0187	NaN	0.0922	NaN	0.0151	0.2543	NaN	NaN	0.0153	0.2642	1.783	0.792	16.6063
Chenomx	0.018	0.1197	NaN	0.0838	NaN	0.0129	NaN	0.0746	NaN	0.1322	0.1138	NaN	NaN	0.1339	0.0894	NaN	0.0217	0.2512	NaN	0.0251	0.0786	0.1361	NaN	NaN	NaN	NaN	NaN	0.0628	NaN	0.0149	NaN	0.3032	NaN	NaN	NaN	0.0837	0.019	NaN	0.0881	NaN	0.0193	0.2559	NaN	NaN	0.0208	0.2384	1.7379	0.781	16.6653
Chenomx	0.0252	0.1116	NaN	0.083	NaN	0.0168	NaN	0.0767	NaN	0.0926	0.1022	NaN	NaN	0.135	0.0907	NaN	0.0202	0.2486	NaN	0.025	0.0796	0.1287	NaN	NaN	NaN	NaN	NaN	0.0585	NaN	0.0157	NaN	0.3043	NaN	NaN	NaN	0.1086	0.0175	NaN	0.083	NaN	0.0193	0.2638	NaN	NaN	0.0199	0.2839	1.7773	0.6762	16.728
Chenomx	0.0239	0.1192	NaN	0.0851	NaN	0.018	NaN	0.0723	NaN	0.0864	0.1155	NaN	NaN	0.1327	0.0889	NaN	0.0247	0.2499	NaN	0.0304	0.0792	0.1146	NaN	NaN	NaN	NaN	NaN	0.091	NaN	0.0175	NaN	0.2987	NaN	NaN	NaN	0.086	0.019	NaN	0.0848	NaN	0.0203	0.2531	NaN	NaN	0.0215	0.2527	1.554	0.9376	15.3719
Chenomx	0.0233	0.1106	NaN	0.0838	NaN	0.0155	NaN	0.075	NaN	0.08	0.091	NaN	NaN	0.1299	0.0888	NaN	0.0211	0.2431	NaN	0.0311	0.088	0.1137	NaN	NaN	NaN	NaN	NaN	0.0844	NaN	0.0141	NaN	0.2971	NaN	NaN	NaN	0.0997	0.0261	NaN	0.0845	NaN	0.0166	0.2549	NaN	NaN	0.0257	0.2561	1.641	0.7761	15.6463
Chenomx	0.0326	0.1294	NaN	0.0849	NaN	0.0181	NaN	0.0736	NaN	0.0989	0.1181	NaN	NaN	0.1333	0.0895	NaN	0.0169	0.2544	NaN	0.0262	0.0767	0.1254	NaN	NaN	NaN	NaN	NaN	0.0606	NaN	0.0167	NaN	0.3019	NaN	NaN	NaN	0.0906	0.0235	NaN	0.0918	NaN	0.0174	0.25	NaN	NaN	0.0186	0.2542	1.8105	0.7972	16.7134
Chenomx	0.0221	0.1191	NaN	0.0838	NaN	0.0156	NaN	0.075	NaN	0.1299	0.1174	NaN	NaN	0.1354	0.0894	NaN	0.0175	0.2575	NaN	0.0243	0.0785	0.131	NaN	NaN	NaN	NaN	NaN	0.0621	NaN	0.0159	NaN	0.3043	NaN	NaN	NaN	0.077	0.019	NaN	0.0892	NaN	0.0167	0.2545	NaN	NaN	0.0228	0.2531	1.813	0.7925	16.7236
PSRR	NaN	0.31495	0.2218	0.0819	0.15595	0.0137	0.2432	0.07425	NaN	0.18315	0.1718	0.044	0.1227	0.1323	0.0963	0.0676	NaN	0.152	NaN	0.10425	0.0666	NaN	NaN	0.4584	0.1393	0.1584	0.0318	0.0381	0.03085	0.0079	0.0329	0.28885	NaN	0.234	0.2047	0.3493	0.0251	0.08535	0.0842	0.04145	0.09855	0.24185	0.2193	0.0262	0.08615	0.6247	1.85225	0.4963	16.7135
PSRR	0.0329	0.3176	0.19735	0.0752	0.1294	NaN	0.22485	0.07865	NaN	0.21755	0.199	0.04795	0.12985	0.12965	0.10325	NaN	NaN	0.1382	NaN	0.0897	0.05785	NaN	NaN	0.349	0.2326	0.1693	NaN	0.0467	NaN	0.0118	NaN	0.2987	0.1117	0.2418	0.2866	0.331	0.01385	0.1144	0.55035	0.06165	0.08905	0.2394	0.24835	0.028	0.0918	0.6155	1.8051	0.3013	16.6313
PSRR	NaN	0.1814	0.29575	0.07575	0.1887	NaN	0.18005	0.08	NaN	0.1653	0.1845	0.0385	0.11465	0.12925	0.10185	0.03	NaN	0.0986	NaN	0.05915	0.02385	NaN	0.055	0.4034	0.16135	0.1473	0.0253	0.03725	0.03775	0.0127	0.03265	0.2995	0.1368	0.2393	0.22895	0.2708	0.0278	0.1124	0.5482	0.03825	0.09	0.2405	0.29235	0.0264	0.05245	0.61375	1.8228	0.496	16.7477
PSRR	0.0559	0.3451	0.2915	0.0885	0.1863	NaN	0.1838	0.0744	NaN	0.16355	0.14945	0.0376	0.11095	0.1365	0.0952	0.05575	NaN	0.1878	NaN	0.0989	0.04805	NaN	0.07935	0.4415	0.1172	0.0275	0.0194	0.0261	0.0536	0.01095	0.04345	0.2935	0.1175	0.2013	0.2052	0.3691	0.0249	0.0817	0.081	0.02115	0.06895	0.2448	0.18065	0.0256	0.0899	0.6156	1.8657	0.6177	16.7246
PSRR	NaN	0.2733	0.2622	0.06785	0.16015	NaN	0.2651	0.07665	NaN	0.17225	0.15065	0.0486	0.1221	0.12015	0.1012	NaN	NaN	NaN	NaN	0.0958	0.0654	NaN	NaN	0.46835	0.2115	0.1661	NaN	0.0239	0.0372	0.0054	0.0253	0.2971	0.0933	0.20145	0.283	0.41495	NaN	0.10945	0.1197	0.05945	0.06525	0.2401	0.37305	0.0256	0.0844	0.6242	1.8229	0.7233	16.7375
PSRR	NaN	0.2903	0.2227	0.0716	0.164	NaN	0.1552	0.07595	0.07735	0.14145	0.1837	0.05245	0.0805	0.1186	0.1008	NaN	NaN	0.2302	NaN	0.1092	0.0737	NaN	0.0334	0.45055	0.19475	0.1622	NaN	0.04215	0.0644	0.0104	0.02995	0.29265	0.0906	0.2139	0.22595	0.3978	0.0298	0.0974	0.5663	0.05155	0.05385	0.24355	0.3621	0.023	0.09005	0.60415	1.81445	0.6245	16.7446
PSRR	0.0603	0.212	0.25525	0.0638	0.2111	NaN	NaN	0.0733	NaN	0.1108	0.1747	0.04805	0.10075	0.1358	0.09845	NaN	NaN	0.2375	NaN	0.04655	0.06915	NaN	0.08825	0.37115	0.2275	0.1446	NaN	0.04555	0.049	0.01045	0.0393	0.29755	NaN	0.299	0.15805	0.15045	0.0309	0.08235	0.0861	0.0498	0.07245	0.23545	0.49675	0.0236	0.0893	0.6168	1.8269	0.2656	16.7607
PSRR	0.0351	0.32645	0.2727	0.06865	0.17575	NaN	0.1778	0.0774	NaN	0.19805	0.1865	0.0486	0.10465	0.1231	0.10055	NaN	NaN	0.1748	NaN	0.07885	0.0915	0.0422	0.01055	0.36845	0.11825	0.02885	NaN	0.0529	0.0466	0.01085	0.03025	0.29495	NaN	0.2572	0.184	0.40325	0.0078	0.10515	0.11545	0.05465	0.0556	0.2467	0.4317	0.0215	0.0576	0.6209	1.78545	0.7233	16.7432
PSRR	0.0378	0.2444	0.2609	0.078	0.1763	NaN	0.1878	0.07125	NaN	0.171	0.1861	0.04085	0.1067	0.1242	0.09205	NaN	NaN	0.1797	NaN	0.0693	0.06345	NaN	NaN	0.4426	NaN	0.1558	NaN	0.0442	NaN	0.00925	0.00595	0.28585	NaN	0.184	0.29235	0.33465	0.0321	0.0836	0.0908	0.05965	0.0514	0.22725	0.25955	0.0236	0.05905	0.65585	1.79285	0.6213	16.6279
PSRR	0.0354	0.298	0.21855	0.0643	0.1832	NaN	0.2296	0.07185	0.0235	0.23395	0.15555	0.03455	0.12245	0.1294	0.0963	NaN	NaN	NaN	0.06565	0.08935	0.07435	NaN	NaN	0.4219	0.13725	0.1128	NaN	0.0367	NaN	0.007	0.03145	0.2977	0.11125	0.2731	0.3307	0.35545	NaN	0.08335	0.13485	0.0395	0.0532	0.23275	0.423	0.0235	0.0524	0.62915	1.7879	0.6836	16.6791
PSRR	0.03465	0.3161	0.2724	0.068	0.14315	0.00905	0.21565	0.0776	0.0844	0.16365	0.185	0.0479	0.08565	0.12075	0.0995	NaN	NaN	0.1577	0.0761	0.0911	0.0917	NaN	NaN	0.4636	0.14995	0.151	NaN	0.04795	0.04905	0.0119	0.02985	0.29735	0.09135	0.2393	0.2248	0.4038	0.01135	0.10835	0.08815	0.0464	0.0624	0.25305	0.34735	0.0219	0.1035	0.62075	1.81485	0.6165	16.6795
PSRR	0.0393	0.23025	0.3056	0.0927	0.17845	0.02655	NaN	0.07275	NaN	0.17415	0.1837	0.03725	0.1047	0.134	0.09435	0.0516	NaN	0.2365	NaN	0.03365	0.0565	NaN	0.04145	0.2165	NaN	0.1639	NaN	0.0316	0.03825	0.01045	0.0293	0.29335	0.1188	0.1916	0.0566	0.1054	0.045	0.087	0.10355	0.05255	0.0729	0.20125	0.36045	0.0238	0.0488	0.64805	1.75805	0.57365	16.7687
PSRR	0.0706	0.24655	0.2179	0.07835	0.16565	NaN	0.2159	0.0741	0.05225	0.22145	0.15195	0.04705	0.10525	0.1366	0.0969	0.05535	NaN	0.2209	NaN	0.0811	0.0772	NaN	0.08745	0.4122	0.1425	0.1399	0.01935	0.03975	0.0462	0.00625	0.03435	0.2966	0.0886	0.24185	0.3066	0.38495	NaN	0.0881	0.0833	0.03985	0.0642	0.2383	0.3231	0.023	0.07825	0.563	1.8406	0.8155	16.8159
PSRR	0.0494	0.19285	0.29765	0.0688	0.18965	NaN	0.26625	0.0755	0.02405	0.1321	0.1743	0.0426	0.11785	0.12635	0.09675	NaN	NaN	0.2019	0.0711	0.0856	0.06565	NaN	NaN	0.38115	0.1442	0.1566	NaN	0.05735	0.0319	0.0066	0.0234	0.29365	0.08775	0.1193	0.31215	0.32195	0.01375	0.09115	0.12545	0.0405	0.0709	0.23305	0.2625	0.022	0.0417	0.5574	1.7577	0.08235	16.3729
PSRR	0.0257	0.25765	0.25875	0.0772	0.13345	NaN	0.2386	0.0777	0.0622	0.12925	0.18695	0.04785	0.10035	0.1203	0.09875	NaN	NaN	0.2091	0.0921	0.1265	0.0989	NaN	NaN	0.4619	NaN	0.00845	NaN	0.0304	0.0459	0.01395	0.02865	0.2908	0.12535	0.2908	0.0978	0.48785	0.0327	0.1057	0.0805	0.04835	0.05965	0.24615	0.2631	0.0245	0.0938	0.6098	1.80815	0.71685	16.7116
PSRR	0.0535	0.30745	0.2566	0.0727	0.1424	NaN	0.1827	0.0757	0.0807	0.1805	0.17175	0.0465	0.10465	0.12905	0.0986	NaN	NaN	NaN	0.0393	0.106	0.0726	NaN	0.06185	0.30615	0.1077	0.0073	NaN	NaN	0.0502	0.00715	0.03445	0.29115	0.09605	0.2806	0.18495	0.33795	0.0243	0.0978	0.0725	0.04965	0.03745	0.24385	0.3294	0.0254	0.0981	0.6084	1.7864	0.6055	16.7792
PSRR	0.06405	0.27685	0.19335	0.0734	0.19355	NaN	0.22155	0.07675	0.05765	0.16905	0.18485	0.042	0.0897	0.13245	0.10075	NaN	NaN	0.1414	NaN	0.09495	0.0736	NaN	NaN	0.4106	0.3137	0.1484	NaN	0.0529	0.04955	0.00785	0.0224	0.2943	0.0697	0.1739	0.30595	0.35085	0.0363	0.1006	0.5637	0.0442	0.0805	0.2254	0.32005	0.0237	0.04995	0.57785	1.7923	0.6941	16.7412
PSRR	NaN	0.23355	0.2655	0.07395	0.1975	NaN	NaN	0.07315	NaN	0.20475	0.1768	0.0367	0.10775	0.1414	0.09585	NaN	NaN	NaN	NaN	0.0399	0.06395	NaN	0.0299	0.29765	0.0923	0.1075	NaN	0.0287	0.03475	0.00935	0.0293	0.28585	0.09855	0.23525	0.1849	0.2773	0.0273	0.0904	0.1207	0.05005	0.0493	0.24295	0.48625	0.02	0.0479	0.5654	1.8274	0.55975	16.7074
PSRR	0.0193	0.25005	0.23145	0.0667	0.1706	NaN	0.1752	0.07625	NaN	0.22735	0.1649	0.04015	0.1108	0.12635	0.09595	NaN	NaN	0.19965	NaN	0.0869	0.08885	NaN	NaN	0.38325	0.1676	0.1244	NaN	0.0511	0.02895	0.00955	0.0268	0.29955	0.1225	0.2122	0.24855	0.424	0.0267	0.10135	0.59035	0.0502	0.0651	0.23605	0.31	0.0237	0.05045	0.5843	1.84965	0.80575	16.7163
PSRR	0.0398	0.28885	0.2795	0.04435	0.20545	NaN	NaN	0.07345	NaN	0.1774	0.1466	0.03985	0.09185	0.13315	0.0914	NaN	NaN	0.19665	NaN	0.04435	0.0273	NaN	0.1542	0.3952	NaN	0.1227	NaN	NaN	0.03845	0.0106	0.03195	0.2459	0.1233	NaN	0.1574	0.2517	0.0286	0.0886	0.31565	0.0377	0.0815	0.11035	0.6399	0.0276	0.0529	0.6166	1.67435	0.39495	15.7793
PSRR	0.051	0.2605	0.2414	0.06955	0.2316	0.0334	NaN	0.07195	0.0819	0.1466	0.16395	0.03435	0.10245	0.1369	0.095	0.0475	NaN	0.1899	NaN	0.0416	0.07425	NaN	0.063	0.3726	0.1103	0.1526	0.0256	0.0308	0.04905	0.0104	0.04315	0.28835	NaN	0.1239	0.1912	0.2647	0.0329	0.08145	0.09075	0.0358	0.07885	0.2231	0.3566	0.0241	0.07005	0.5648	1.79605	0.586	16.7466
PSRR	0.04625	0.2325	0.2708	0.08675	0.166	0.0301	NaN	0.07165	NaN	0.20415	0.17005	0.0362	0.10015	0.13865	0.09525	0.0562	NaN	0.1185	NaN	0.0524	0.09375	NaN	0.1118	0.2979	0.10095	0.1494	NaN	0.031	0.0406	0.0096	0.0381	0.3018	0.0908	0.2569	0.164	0.19165	0.028	0.0821	0.0969	0.04155	0.04585	0.2511	0.24605	0.0221	0.07005	0.5456	1.85695	0.5947	16.7644
PSRR	0.0373	0.2651	0.2556	0.04955	0.1797	NaN	0.2289	0.07235	NaN	0.13235	0.1746	0.0368	0.092	0.12985	0.09285	NaN	NaN	0.2182	NaN	0.07405	0.0465	NaN	0.0947	0.31595	0.10505	0.1461	0.0422	0.02595	0.02835	0.0106	0.0281	0.28585	0.1177	0.2138	0.23535	0.3349	NaN	0.0787	0.11885	0.03765	0.07715	0.2272	0.40945	0.0231	0.04855	0.5708	1.81785	NaN	16.7639
PSRR	0.0355	0.25165	0.26105	0.06915	0.15625	NaN	NaN	0.07315	0.0337	0.1699	0.16035	0.0419	0.10655	0.13965	0.09255	NaN	NaN	0.18	NaN	0.0805	0.09645	0.07945	0.0833	0.31385	0.1538	0.01805	NaN	0.04245	0.0514	0.01485	0.0342	0.2952	0.0835	0.33125	0.1715	0.3053	0.0346	0.0897	0.5951	0.0473	NaN	0.25775	0.41095	0.0198	0.0526	0.55815	1.8001	0.5993	16.8226
PSRR	0.0313	0.35955	0.242	0.08125	0.151	0.03165	0.2563	0.0726	NaN	0.1733	0.17345	0.0407	0.1051	0.13085	0.0978	NaN	NaN	0.2129	NaN	0.07375	0.0762	0.0478	NaN	0.4618	0.28495	0.1558	NaN	0.04105	0.05645	0.00845	0.0337	0.2925	0.0545	0.25935	0.2135	0.4072	0.0292	0.08445	0.34865	0.0498	0.0575	0.23585	0.3172	0.0235	0.07405	0.6169	1.73965	0.666	16.7534
PSRR	0.0345	0.2687	0.22285	0.08465	0.18775	0.01525	NaN	0.0722	NaN	0.1316	0.1298	0.03435	0.1022	0.13625	0.09295	NaN	NaN	0.19095	NaN	0.0592	0.1126	0.0727	0.0688	0.352	0.09455	0.00435	NaN	0.0458	0.04965	0.0121	0.0319	0.29365	NaN	0.2599	0.1425	0.25785	0.0336	0.08695	0.12775	0.02865	0.02655	0.24045	0.2007	0.021	0.0908	0.57295	1.8156	0.099	16.7232
PSRR	0.0644	0.28975	0.178	0.07005	0.1793	0.0177	0.2194	0.07655	NaN	0.16815	0.1624	0.0451	0.1136	0.11975	0.10065	NaN	NaN	0.18365	NaN	0.06845	0.0701	NaN	NaN	0.4606	0.2451	0.1457	NaN	0.0437	0.06985	0.0093	0.02755	0.2937	0.07035	0.1464	0.24675	0.3953	0.0294	0.10515	0.559	0.04905	0.0641	0.2331	0.4625	0.0237	0.08465	0.57995	1.83595	0.45045	16.6686
PSRR	0.0276	0.2661	0.3088	0.0789	0.18075	0.0328	NaN	0.07655	0.1	0.18215	0.1772	0.04915	0.1052	0.1393	0.0994	NaN	NaN	0.18655	NaN	0.04255	0.0608	NaN	0.05895	0.37925	NaN	0.1507	0.0138	0.0268	0.0363	0.011	0.03655	0.28455	0.1163	0.2994	0.1609	0.28285	0.0295	0.1049	0.0765	0.03875	NaN	0.22845	0.5036	0.022	0.05745	0.63555	1.8183	0.5619	16.7213
PSRR	0.0833	0.3468	0.23215	0.0771	0.18715	NaN	0.27235	0.0738	NaN	0.1947	0.13565	0.048	0.1121	0.1318	0.09665	NaN	NaN	0.08725	0.08855	0.09825	0.0671	NaN	NaN	0.41975	0.20855	0.1542	0.0247	0.03485	0.0486	0.0087	0.03325	0.29775	NaN	0.2443	0.1224	0.33325	0.0243	0.0801	0.0862	0.0348	0.07855	0.21025	0.2291	0.022	0.0883	0.60065	1.84065	0.6175	16.8158
PSRR	0.04805	0.30435	0.2889	0.07245	0.14445	0.017	NaN	0.07125	0.0449	0.1704	0.1868	0.03625	0.12405	0.13915	0.0947	NaN	NaN	0.17535	NaN	0.04385	0.07935	0.0258	0.0636	0.1833	0.0925	0.1666	NaN	0.0586	0.051	0.0189	0.02055	0.2812	0.11005	0.2398	0.2897	0.20045	0.0308	0.0938	0.5354	0.04085	0.05585	0.2523	0.47085	0.021	0.0625	0.64445	1.76395	0.6643	15.6423
PSRR	0.0556	0.2401	0.27365	0.08805	0.17005	0.03815	0.1726	0.0717	0.0897	0.1514	0.1459	0.04115	0.0985	0.134	0.0957	NaN	NaN	0.1362	NaN	0.1038	0.0959	NaN	0.0722	0.3951	0.3502	0.0215	NaN	0.0751	NaN	0.0094	0.0296	0.28785	0.0678	NaN	0.2858	0.33225	0.0505	0.07915	0.08735	0.05255	0.0611	0.2214	0.1	0.0193	0.0474	0.5893	1.77465	0.6747	16.1312
PSRR	NaN	0.23585	0.3171	0.08135	0.18405	0.03565	0.1088	0.07785	NaN	0.14215	0.19	0.04425	0.1085	0.143	0.1018	NaN	NaN	0.2101	NaN	0.0491	0.06925	NaN	NaN	0.36215	NaN	NaN	NaN	0.0237	NaN	0.0114	0.02135	0.2979	0.1056	0.22355	0.1592	0.15675	0.0292	0.10745	0.0517	0.0409	0.0396	0.2562	0.31855	0.0232	0.0731	0.3579	1.81105	0.59715	16.7393
PSRR	NaN	0.2973	0.20295	0.0832	0.15375	NaN	0.1888	0.0764	NaN	0.204	0.1871	0.0468	0.1178	0.1311	0.09725	NaN	NaN	0.0722	0.06075	0.0806	0.07925	NaN	NaN	0.25195	0.11375	0.0622	0.0286	NaN	NaN	0.00885	0.02165	0.29085	0.1175	0.229	0.1414	0.35555	0.0288	0.1064	0.0899	0.0465	0.0761	0.2443	0.2112	0.0215	0.08155	0.3002	1.8356	0.79225	16.7581
MC	0.0403396	0.264055	0.287671	0.0923572	0.163854	0.00741221	0.0578601	0.0740375	0.00547577	0.176498	0.180357	0.0435104	0.107877	0.153731	0.102519	0.0276356	0.00978878	0.16727	0.0227843	0.0515433	0.081584	0.00136196	0.0696911	0.317812	0.145563	0.0306054	0.0228959	0.00778908	0.0236995	0.0152895	0.0283681	0.297484	0.227538	0.0950172	0.270831	0.0971304	0.0269809	0.0445686	0.0673881	0.0610368	0.0793168	0.102483	0.316141	0.0199077	0.09278	0.621704	1.85726	0.766122	16.7343
MC	0.0561299	0.375098	0.311588	0.0863935	0.143194	0.0149871	0.0613814	0.0796463	0.0217928	0.157389	0.196717	0.036967	0.115624	0.146344	0.109615	0.0329355	5.00019e-05	0.218985	0.0236203	0.0610187	0.0897717	0.00374482	0.056264	0.210582	0.161593	0.0348979	0.0215051	0.0295261	0.0171489	0.0133868	0.0271184	0.305548	0.258975	0.136324	0.586584	0.137978	0.0221454	0.041411	0.0899853	0.064769	0.0747625	0.238407	0.202807	0.026075	0.0824385	0.636074	1.81178	0.827111	16.621
MC	0.0178591	0.109527	0.219459	0.0893344	0.162103	0.0097444	0.0521685	0.0801688	0.000743775	0.300631	0.171551	0.046222	0.103755	0.128226	0.106957	0.0514827	0.00472966	0.176363	0.0182424	0.0371892	0.0882194	0.000278468	0.138096	0.233594	0.13061	0.0224667	0.0187669	0.0189418	0.0173978	0.0155478	0.0299556	0.305332	0.0348979	0.190285	0.33621	0.121663	0.0277022	0.0565356	0.0879781	0.0630556	0.0225729	0.112749	0.241395	0.0242211	0.105662	0.667402	1.85787	0.924991	16.1229
MC	0.047126	0.165605	0.247505	0.092005	0.131437	0.0276303	0.0459788	0.074469	0.015883	0.320585	0.162085	0.0339823	0.0932773	0.101384	0.100967	0.0368336	0.0131875	0.192934	0.0291554	0.0495921	0.074392	0.00138841	0.15527	0.218743	0.0464304	0.0261422	0.0166659	0.0363332	0.0289255	0.0177718	0.0307176	0.299366	0.303354	0.129218	0.332837	0.113859	0.0247284	0.0614301	0.0854668	0.0583291	0.0503683	0.254866	0.13151	0.0192125	0.0973119	0.652042	1.85548	1.0535	15.9659
MC	0.0604161	0.397326	0.246367	0.0889915	0.173885	0.0152989	0.0543751	0.077514	0.015563	0.360809	0.16883	0.0282092	0.118436	0.113571	0.106973	0.0318033	0.0117253	0.197788	0.0440335	0.0640058	0.0882743	0.00548941	0.154627	0.252437	0.0543694	0.0256888	0.0313399	0.0408992	0.0235693	0.0139138	0.025866	0.313956	0.0487979	0.0418353	0.485367	0.120453	0.0321806	0.0339123	0.0928887	0.0604298	0.0411304	0.230117	0.294836	0.0218099	0.0729289	0.665612	1.8474	1.09472	16.0424
MC	0.0320602	0.266488	0.221553	0.0876118	0.163249	0.0179269	0.0581557	0.0767533	1.66393e-05	0.156884	0.183587	0.0419782	0.104083	0.0932185	0.105846	0.0386148	0.00118632	0.211275	0.0160804	0.0504195	0.081793	0.00141596	0.13886	0.340228	0.103615	0.0315201	0.0229009	0.0388051	0.00942997	0.012228	0.0262742	0.318433	0.0428768	0.0583632	0.182801	0.134172	0.0403606	0.0404166	0.0772171	0.06863	0.0171061	0.0397663	0.234429	0.0166671	0.0976121	0.650117	1.84494	0.850238	16.6488
MC	0.081349	0.13947	0.26427	0.0886553	0.153251	0.00446186	0.00157677	0.0737221	0.0188073	0.318697	0.174674	0.0375605	0.0995614	0.137801	0.101997	0.0310006	0.024453	0.21948	0.000770768	0.0259679	0.0943202	0.000930312	0.167666	0.227278	0.0122222	0.0270254	0.0364117	0.0325392	0.0210288	0.0127725	0.0267041	0.292094	0.292414	0.150089	0.20757	0.119002	0.0308288	0.0489312	0.112467	0.0634689	0.0489176	0.262948	0.192849	0.0225249	0.107714	0.681326	1.63697	0.9443	16.1799
MC	0.0325928	0.289458	0.300758	0.0857233	0.169657	0.0270219	0.0457144	0.0774259	0.00494219	0.193223	0.18421	0.0355777	0.113515	0.090372	0.106561	0.037063	4.86667e-05	0.190046	0.0429927	0.0779395	0.106651	0.00400646	0.0966938	0.266718	0.0364767	0.0300528	0.0196647	0.0302114	0.0208104	0.0153325	0.0271077	0.296269	0.174092	0.175015	0.344445	0.130816	0.0273899	0.0467126	0.0562236	0.0641056	0.0217713	0.261053	0.292007	0.0199862	0.105673	0.642733	1.80412	0.783684	16.7521
MC	0.0401047	0.613987	0.342786	0.0866648	0.153737	0.0208189	0.0401395	0.0718088	0.00205849	0.276756	0.184079	0.0357453	0.100679	0.107081	0.100883	0.0200413	0.000313661	0.113206	0.0482883	0.0955892	0.0830352	0.000919036	0.0261037	0.277116	0.117455	0.0144317	0.016775	0.0385975	0.0106212	0.0107595	0.0271369	0.29791	0.183416	0.170356	0.35913	0.145751	0.0320299	0.0427184	0.0563439	0.0628018	0.0197162	0.0265208	0.323225	0.0184052	0.105538	0.683167	1.79782	0.797632	16.6414
MC	0.0550113	0.28714	0.303232	0.0871245	0.169848	0.0129756	0.0462295	0.0719265	0.00280481	0.218947	0.18421	0.0288319	0.100086	0.144981	0.101936	0.0295354	0.00140224	0.172684	0.0338508	0.0879713	0.0916224	0.00271923	0.142616	0.283406	0.0402759	0.024529	0.0158443	0.0378202	0.0207076	0.0132977	0.0264939	0.298889	0.107344	0.0625584	0.938068	0.13106	0.0288453	0.0423543	0.102894	0.0669966	0.0191765	0.229858	0.222582	0.0207448	0.0894921	0.62517	1.81873	0.878643	16.5829
MC	0.0645515	0.47765	0.320866	0.0875357	0.170802	0.0110604	0.0368455	0.0781755	0.0167346	0.190288	0.181487	0.044424	0.10716	0.119559	0.106462	0.00362135	0.0204202	0.166851	0.0608902	0.0920457	0.10466	0.0113916	0.0879184	0.245842	0.136283	0.0321352	0.0137849	0.031249	0.0255362	0.0129515	0.0269337	0.310682	0.239294	0.111867	0.11055	0.12297	0.0286154	0.0500605	0.0593776	0.0610452	0.0270027	0.0653347	0.109313	0.0201509	0.118556	0.645192	1.84768	0.881433	16.6552
MC	0.0672124	0.182557	0.263807	0.090951	0.169119	0.010555	0.00691727	0.0725988	0.0196832	0.367241	0.161822	0.0326489	0.0930589	0.126171	0.101361	0.0496707	0.0175665	0.182231	0.0140007	0.0143373	0.0805672	0.000105261	0.165571	0.250254	0.0439065	0.00897761	0.029102	0.0387171	0.0217922	0.0129935	0.0291661	0.297877	0.125667	0.105607	0.157974	0.107802	0.0449526	0.0514472	0.0589564	0.0672838	0.0149384	0.244793	0.323612	0.0205311	0.0942367	0.704457	1.82559	0.989332	16.1181
MC	0.109955	0.138617	0.213366	0.0908547	0.199622	0.0180662	0.0493639	0.0748345	0.0238872	0.291067	0.167193	0.039017	0.0984904	0.122773	0.101061	0.0419507	0.028464	0.143045	0.028393	0.0484574	0.0902467	0.0078292	0.141621	0.25693	0.0855875	0.0295267	0.0133941	0.0380086	0.0398496	0.0124626	0.0281707	0.308531	0.104651	0.0447306	0.517763	0.105997	0.0221392	0.051971	0.117146	0.0585175	0.0538249	0.0339489	0.223218	0.0197822	0.102387	0.61999	1.87847	0.84707	16.6911
MC	0.0623513	0.311836	0.281946	0.0858021	0.138326	0.0317987	0.0408089	0.0752741	0.0025322	0.0894707	0.17007	0.0351058	0.100781	0.124396	0.100992	0.0403759	0.0118374	0.176936	0.0212146	0.0501697	0.0840722	0.00263393	0.117671	0.299364	0.169984	0.0265746	0.0148551	0.0341072	0.025955	0.0137501	0.025592	0.301062	0.172161	0.122486	0.775995	0.117717	0.0227048	0.0439117	0.0670422	0.055499	0.0356863	0.241436	0.244179	0.0132429	0.0825766	0.592721	1.71669	0.962989	15.8087
MC	0.0458172	0.421228	0.336314	0.0897735	0.14487	0.0186222	0.0531561	0.0781428	0.0372018	0.242669	0.18094	0.0479041	0.112057	0.154744	0.107198	0.0323977	0.0258186	0.148276	0.069332	0.0850096	0.113851	0.00150129	0.110285	0.24191	0.0818695	0.0299943	0.0166401	0.0336864	0.0245584	0.0172689	0.0285313	0.306392	0.0530488	0.128612	0.545019	0.132307	0.0325984	0.0468856	0.054202	0.0687354	0.0399301	0.257195	0.306711	0.0242414	0.117088	0.648135	1.84198	0.781537	16.7387
MC	0.0697285	0.148889	0.2349	0.0870117	0.158247	0.0102362	0.0546038	0.0760596	0.00402395	0.217461	0.178098	0.0495305	0.104585	0.125629	0.103273	0.071524	0.011705	0.280944	0.0421549	0.108983	0.11613	0.00208717	0.111289	0.235194	0.0159622	0.0286102	0.0161221	0.0306996	0.0313557	0.0127079	0.0309484	0.304467	0.00811801	0.186439	0.488429	0.107911	0.0291004	0.060869	0.088146	0.0590247	0.00961873	0.0230024	0.31943	0.0203942	0.117793	0.655389	1.80915	0.819592	16.7517
MC	0.0536636	0.26015	0.268661	0.0868716	0.185146	0.0236162	0.0389716	0.0774552	0.0125818	0.26592	0.182023	0.0386703	0.109119	0.131554	0.106945	0.01078	0.031181	0.181246	0.0421028	0.0538783	0.07096	0.000492979	0.158048	0.257453	0.119387	0.0227708	0.0182376	0.0388385	0.0304407	0.0120491	0.0251139	0.300112	0.217942	0.0396703	0.571103	0.115311	0.0361132	0.0358907	0.116278	0.0630114	0.0299774	0.244885	0.339214	0.0156471	0.0925366	0.648159	1.81514	1.1617	15.9579
MC	0.0981694	0.155151	0.254784	0.0893582	0.195214	0.00870572	0.0385926	0.0738474	0.0145729	0.30075	0.17178	0.0448847	0.100708	0.123372	0.102365	0.0357828	0.00577573	0.219201	0.0189491	0.0461233	0.0979931	0.00148364	0.0994271	0.236304	0.108848	0.0281824	0.0178916	0.0320655	0.0330628	0.0158563	0.027136	0.289209	0.22596	0.154118	0.330945	0.105572	0.0272606	0.0480658	0.0411312	0.0705418	0.023359	0.0716755	0.28183	0.0178839	0.0976338	0.627491	1.84616	0.776688	16.7003
MC	0.119793	0.455632	0.270671	0.0872593	0.171627	0.0139091	0.0384394	0.0766944	0.0145797	0.200323	0.179858	0.0499194	0.106517	0.11295	0.104605	0.00634707	0.0137004	0.14282	0.028728	0.0864583	0.0951948	0.0572257	0.124501	0.198952	0.0545056	0.0235609	0.013375	0.0305544	0.0437521	0.0149002	0.0272297	0.304259	0.175826	0.199363	0.916136	0.127117	0.0288905	0.0517655	0.0979428	0.064457	0.0333163	0.0704037	0.258935	0.0136835	0.0950735	0.663071	1.86598	0.857258	16.6493
MC	0.0764459	0.198705	0.241257	0.0761899	0.115489	0.0157637	0.0171219	0.0733566	0.0546233	0.21427	0.133822	0.0407521	0.101306	0.108301	0.097939	0.0016546	0.0136752	0.189823	0.0334582	0.0204625	0.0861129	0.000206625	0.165321	0.210506	0.108134	0.0325636	0.0126781	0.0243481	0.0390959	0.0121729	0.0289031	0.298846	0.0674901	0.150759	0.157228	0.107176	0.028577	0.0544865	0.100902	0.0657726	0.0382712	0.0311161	0.0988448	0.0219748	0.108943	0.704303	1.74524	0.992706	15.6894
MC	0.0774156	0.13815	0.224457	0.0897832	0.188311	0.0284573	0.0516154	0.0724004	0.0333531	0.130556	0.157095	0.0426431	0.09163	0.128083	0.100052	0.0408317	0.0245623	0.227354	0.0100334	0.0287884	0.0884748	0.00529723	0.0641732	0.18404	0.160932	0.0294471	0.0122894	0.0404726	0.027733	0.0138423	0.0274257	0.290576	0.148749	0.106547	0.170852	0.120403	0.0328043	0.0447966	0.0781893	0.0605343	0.0563182	0.0544698	0.191399	0.0229496	0.0803662	0.557589	1.78868	0.791615	16.7372
MC	0.0548227	0.233941	0.224771	0.0868681	0.162003	0.0162589	0.0302612	0.0720389	0.00266629	0.182698	0.165556	0.0346592	0.0885699	0.119854	0.0993683	0.0602412	0.0237271	0.208516	0.00444835	0.0672538	0.108102	0.00188215	0.115288	0.187305	0.145573	0.0105169	0.029183	0.0392314	0.0263635	0.0156162	0.0262855	0.300135	0.125402	0.101615	0.108923	0.125135	0.027928	0.0387391	0.0763421	0.0631639	0.0381766	0.249887	0.277903	0.0219223	0.0900088	0.589126	1.84186	0.803274	16.6943
MC	0.0691599	0.0715646	0.278695	0.0871222	0.160651	0.0185161	0.0456393	0.0723531	0.00124278	0.218955	0.164334	0.0338964	0.0939087	0.120854	0.100455	0.0455364	0.0225645	0.213731	0.0150003	0.0433311	0.0647413	0.0096252	0.111428	0.221611	0.0915414	0.0280134	0.0151359	0.0402733	0.0247929	0.0156901	0.0266742	0.301466	0.211015	0.0711738	0.32869	0.104969	0.0311763	0.0388132	0.0771585	0.0604928	0.0619378	0.0748654	0.186694	0.0162056	0.0468153	0.605769	1.85322	0.586809	16.7906
MC	0.0801496	0.0972013	0.231071	0.0900884	0.172723	0.0168104	0.0353089	0.0736766	0.0161589	0.234542	0.175165	0.0388845	0.0970075	0.150713	0.101537	0.036252	0.0176156	0.232647	0.0132609	0.0522608	0.110195	0.00628031	0.150386	0.195788	0.0820118	0.0142458	0.0218235	0.0326833	0.0300815	0.0164005	0.0262942	0.294216	0.111498	0.131839	0.318639	0.117208	0.0346107	0.0504675	0.0880192	0.0679564	0.022768	0.261698	0.281771	0.0170715	0.102175	0.620276	1.85141	0.818832	16.7482
MC	0.0669991	0.288725	0.233882	0.0885566	0.170438	0.0196007	0.0398825	0.0726563	0.00115039	0.176994	0.172289	0.0354274	0.0958086	0.102081	0.101851	0.0294051	0.0160079	0.23152	0.0374499	0.059244	0.0871323	0.0197248	0.0831332	0.224541	0.0516194	0.0262937	0.0217529	0.0320921	0.0329249	0.0145198	0.0251873	0.300722	0.120551	0.141149	0.296361	0.136304	0.032753	0.0369889	0.0534969	0.0669371	0.00850325	0.0672818	0.295941	0.0204331	0.101096	0.627079	1.83336	0.828582	16.7512
MC	0.0487051	0.230764	0.209484	0.0870669	0.156504	0.0283874	0.0229277	0.0726676	0.00576522	0.223329	0.162702	0.0349652	0.0922434	0.154838	0.10027	0.055871	0.00625404	0.211606	0.0173945	0.0556393	0.112605	0.000255619	0.095516	0.199663	0.0441057	0.0211347	0.0169459	0.028553	0.0221307	0.0147226	0.0279439	0.288941	0.121884	0.16896	0.0575422	0.110799	0.033534	0.0461901	0.0675263	0.0628709	0.0288555	0.256609	0.287531	0.0203034	0.0967235	0.601636	1.8427	0.684046	16.7106
MC	0.0452441	0.136572	0.182098	0.0907494	0.160089	0.0187487	0.0449947	0.0770178	0.000112107	0.197233	0.169504	0.0494844	0.106782	0.110279	0.105516	0.030759	0.0152613	0.24021	0.0299447	0.0471132	0.0853816	4.93331e-05	0.102662	0.210082	0.0178676	0.0259016	0.0192695	0.0396788	0.0209503	0.0158347	0.0249441	0.303894	0.206629	0.0413999	0.457275	0.115649	0.0305186	0.0394182	0.0775115	0.0615643	0.0216073	0.0511109	0.196823	0.016383	0.0911088	0.588233	1.84994	0.777772	16.6793
MC	0.0767447	0.192542	0.279112	0.0872582	0.213202	0.00503502	0.0321835	0.0773472	0.0186814	0.188196	0.179862	0.042959	0.106636	0.116094	0.10572	0.0346066	0.00887382	0.156031	0.0143882	0.0242658	0.0797852	0.00122737	0.0880122	0.244383	0.0525649	0.027909	0.0204862	0.0292463	0.0256196	0.0142238	0.0252684	0.300262	0.158311	0.162862	0.502582	0.125374	0.0295034	0.0379792	0.0769394	0.0647773	0.025866	0.25806	0.327016	0.0189286	0.091689	0.647951	1.8132	0.790518	16.7244
MC	0.0595789	0.540385	0.265187	0.0912181	0.18593	0.0304349	0.0471215	0.0737497	0.00131882	0.139748	0.168425	0.0396704	0.0882501	0.101213	0.101218	0.0577524	0.0147205	0.265412	0.0234749	0.0554208	0.0608953	0.00161123	0.0670975	0.216403	0.0749559	0.0215136	0.0159161	0.0433163	0.0345023	0.0157556	0.027096	0.292023	0.0619142	0.0538367	0.408474	0.135356	0.0242045	0.0375709	0.0501198	0.0623995	0.0367862	0.078632	0.0582488	0.0173501	0.102445	0.623986	1.84802	0.626492	16.7837
MC	0.0693749	0.0863715	0.188563	0.088507	0.173375	0.0161361	0.000237734	0.0716458	0.0145175	0.142063	0.160118	0.0348195	0.1086	0.126081	0.104325	0.0286497	0.000160487	0.170519	0.00575621	0.0543389	0.0907561	0.00197701	0.126238	0.296948	0.0135875	0.015571	0.0277688	0.0404815	0.0206818	0.0162261	0.0259365	0.281725	0.141418	0.0898542	0.293492	0.141467	0.0308065	0.0281919	0.059876	0.0728928	0.0141426	0.25415	0.45136	0.0204494	0.0627771	0.667392	1.72334	0.977945	15.9696
MC	0.0274016	0.499948	0.246028	0.0883167	0.147581	0.0156523	0.040238	0.0718175	0.0346785	0.237513	0.142309	0.0300727	0.096278	0.113535	0.0991731	0.00512826	0.0310453	0.184067	0.0372908	0.0834938	0.103452	0.000954816	0.157517	0.251984	0.112246	0.0194674	0.0139015	0.0366718	0.0528391	0.0141959	0.0272147	0.298318	0.0397318	0.15457	0.242839	0.134082	0.0531972	0.0471831	0.0715664	0.0601649	0.0465486	0.0621314	0.121695	0.0166824	0.106205	0.629241	1.77293	1.2299	15.4593
MC	0.053978	0.0472585	0.251989	0.0918825	0.140294	0.0192561	0.000756337	0.0777003	0.0162964	0.161498	0.189465	0.0392078	0.108388	0.135309	0.107842	0.0426477	0.0164714	0.169204	0.000585477	0.0418685	0.0949321	0.00157067	0.0912109	0.295381	0.037027	0.0303106	0.022346	0.0319121	0.0280745	0.0197895	0.026131	0.312716	0.151079	0.165429	0.0563679	0.125989	0.0291555	0.046192	0.0726224	0.071101	0.01358	0.250772	0.151472	0.0207682	0.100565	0.284131	1.85479	0.809599	16.7376
MC	0.0334092	0.494998	0.208792	0.089257	0.187314	0.013847	0.0349866	0.0774138	0.00277666	0.243081	0.183989	0.0552478	0.105536	0.112961	0.106683	0.0495381	0.0215305	0.216064	0.0480636	0.0817759	0.0894514	0.00129138	0.0939605	0.259351	0.0897568	0.026283	0.0203464	0.0394804	0.0191816	0.0126878	0.0273834	0.3024	0.0974448	0.0597752	0.262877	0.133808	0.0287133	0.0451628	0.0743253	0.0627656	0.0213987	0.0275762	0.0383999	0.0162035	0.104672	0.25984	1.86992	0.845002	16.7767
[truncated: 100 more columns]

## Sheet: Averages
			Chenomx				PSRR					MC				Mean %Error	Mean %SD
			Mean	Std Dev	RSD (%)		Mean	Std Dev	%RSD	%Error		Mean	Std Dev	%RSD	%Error	37.7927	66.5869
Dimethylamine			0.465539	0.00514842	1.1059		0.467341	0.00349244	0.747299	0.386974		0.466726	0.00438041	0.938539	0.254937
u233			0.781127	0.0691416	8.85152		0.707583	0.022838	3.22761	9.4151		0.802596	0.012916	1.60928	2.74838
u122			2.78768	0.0789581	2.83239		3.34961	0.0695161	2.07535	20.1573		3.36527	0.0710453	2.11113	20.7193
u11			3.0495	0.0651567	2.13664		3.23611	0.063771	1.97061	6.11928		3.26538	0.0704525	2.15756	7.07909
Creatinine			16.5767	0.342655	2.06708		16.6434	0.273252	1.6418	0.402106		16.4732	0.384204	2.3323	0.624812
Alanine			0.302824	0.00472586	1.5606		0.291697	0.00960175	3.29169	3.6745		0.300428	0.00769766	2.56223	0.791411
Citrate			1.76253	0.0650504	3.69073		1.80582	0.0383842	2.12558	2.456		1.82024	0.0515078	2.82973	3.27389
3-Hydroxyisovalerate			0.0904545	0.00194793	2.15349		0.0971909	0.0031331	3.22366	7.44724		0.103347	0.00304589	2.94723	14.2534
Hippurate			1.29398	0.019101	1.47615		1.29336	0.0565016	4.36861	0.048125		1.33664	0.0405754	3.03562	3.29716
1-Methylnicotinamide			0.0836636	0.00225136	2.69097		0.0740515	0.0101506	13.7075	11.489		0.0882771	0.00285904	3.23872	5.51427
Trimethylamine N-oxide			0.509667	0.00922353	1.80972		0.441643	0.157814	35.7334	13.3466		0.50455	0.0164193	3.25425	1.00402
2-Hydroxyisobutyrate			0.0749848	0.00139017	1.85394		0.0746864	0.0024317	3.25588	0.39806		0.0750423	0.00254173	3.38707	0.0766164
u217			0.226848	0.036577	16.124		0.271302	0.0404193	14.8983	19.5959		0.573702	0.0218064	3.801	152.901
N,N-Dimethylglycine			0.0978879	0.00138941	1.41939		0.0819818	0.022372	27.289	16.2493		0.101878	0.00399989	3.92617	4.07588
u075			1.03717	0.030377	2.92884		0.296933	0.201254	67.7775	71.3708		0.996118	0.0418381	4.20012	3.95782
Pyroglutamate			0.226018	0.0113983	5.0431		0.384885	0.0169257	4.39761	70.2893		0.382662	0.0188135	4.91648	69.3057
Glycine			1.36932	0.0269096	1.96518		1.2823	0.0373164	2.91012	6.35517		1.25576	0.0628225	5.00276	8.29345
N-AcetylglutamineDerivative			1.34374	0.0865802	6.44325		1.22888	0.0559051	4.54926	8.54729		1.35924	0.0697094	5.12856	1.15377
Adipate			NaN	NaN	NaN		0.0300406	0.00721312	24.0112	NaN		0.0271895	0.00151518	5.57268	NaN
Formate			0.149342	0.00822162	5.50521		0.153624	0.008604	5.60068	2.86711		0.153707	0.00866519	5.63746	2.92275
N-Acetylglutamine			NaN	NaN	NaN		0.1505	0.00996716	6.6227	NaN		0.187413	0.0113486	6.0554	NaN
Butanone			NaN	NaN	NaN		0.0448697	0.00876864	19.5425	NaN		0.0637919	0.0039821	6.24233	NaN
Methylguanidine			0.0488485	0.00522441	10.6951		0.112238	0.012976	11.5612	129.767		0.099205	0.00650489	6.55702	103.087
Trigonelline			0.0950545	0.00217055	2.28348		0.106056	0.0109612	10.3353	11.5739		0.102135	0.00693233	6.7874	7.44923
3-Aminoisobutyrate			0.112085	0.0077838	6.94456		0.170485	0.0170523	10.0022	52.1034		0.17237	0.0128683	7.46553	53.7852
Malonate			0.358788	0.0559078	15.5824		0.321264	0.0598016	18.6145	10.4586		0.440279	0.0329493	7.48373	22.7129
3-Hydroxybutyrate			NaN	NaN	NaN		0.106729	0.0113241	10.6102	NaN		0.102131	0.00769232	7.53183	NaN
Ethanolamine			0.4721	0.042704	9.04553		0.791921	0.0676275	8.53968	67.7444		0.797431	0.0613438	7.69268	68.9115
N-Methylhydantoin			0.107018	0.00511954	4.7838		0.127611	0.0364478	28.5618	19.242		0.118284	0.0109486	9.2562	10.5268
Asparagine			0.0818636	0.00959863	11.7251		0.319409	0.0871574	27.2871	290.172		0.12207	0.0121599	9.96142	49.1138
Proline			NaN	NaN	NaN		0.680744	0.0427501	6.27991	NaN		0.288744	0.0311743	10.7965	NaN
β-Alanine			NaN	NaN	NaN		0.246532	0.0285337	11.5741	NaN		0.256658	0.0288935	11.2576	NaN
Glutamine			0.45233	0.0421649	9.3217		0.469291	0.0397181	8.46342	3.74961		0.54103	0.0610954	11.2924	19.6095
Hypoxanthine			0.0724545	0.00369942	5.10584		0.0700727	0.0117517	16.7707	3.28733		0.0749399	0.00889132	11.8646	3.43029
Trimethylamine			0.0365	0.00528394	14.4765		0.0387652	0.00812808	20.9675	6.20589		0.0404892	0.00496462	12.2616	10.9294
2-Aminoadipate			NaN	NaN	NaN		0.173409	0.0226316	13.051	NaN		0.165185	0.0203321	12.3087	NaN
u122triplet			NaN	NaN	NaN		0.132598	0.0101714	7.67083	NaN		0.123778	0.015294	12.356	NaN
u380large			0.122072	0.0341993	28.0157		0.205212	0.01227	5.97917	68.1076		0.186439	0.0234531	12.5795	52.7292
Ethanol			NaN	NaN	NaN		0.182253	0.0169938	9.32426	NaN		0.155979	0.0199072	12.7627	NaN
Acetone			0.0154212	0.00157118	10.1884		0.0101182	0.00263986	26.0903	34.3879		0.0144521	0.00190736	13.1978	6.28459
Sarcosine			0.0296727	0.00164075	5.52947		0.0400641	0.00661466	16.5102	35.0198		0.0404009	0.00548516	13.5768	36.1551
Taurine			1.22084	0.0518859	4.25003		1.02505	0.0968277	9.44617	16.0373		1.07531	0.14735	13.703	11.92
Fumarate			0.00295152	0.000581013	19.6852		0.00314242	0.000692721	22.0442	6.46817		0.00409313	0.000571379	13.9595	38.679
u144			0.513088	0.0713495	13.9059		1.13769	0.254524	22.372	121.735		1.18829	0.167124	14.0643	131.596
3-Hydroxyisobutyrate			0.134045	0.00137911	1.02883		0.1312	0.00679078	5.1759	2.12275		0.122971	0.0174142	14.1612	8.26151
Threonine			0.169082	0.0123085	7.27959		0.173935	0.0654583	37.6338	2.87023		0.152834	0.02244	14.6826	9.60934
4-Hydroxybenzoate			0.0819182	0.00479723	5.85612		0.0718682	0.0190673	26.5309	12.2683		0.0907684	0.0135194	14.8944	10.8037
Chlorogenate			NaN	NaN	NaN		0.0233	0.00210327	9.02692	NaN		0.0194769	0.00298261	15.3136	NaN
cis-Aconitate			0.245676	0.024114	9.81538		0.585132	0.0723807	12.37	138.172		0.616258	0.0946739	15.3627	150.842
5-Aminolevulinate			NaN	NaN	NaN		0.37787	0.0731644	19.3623	NaN		0.243882	0.0381075	15.6254	NaN
Choline			0.0197818	0.00431346	21.8052		0.0702879	0.0185348	26.3699	255.316		0.0957764	0.0149732	15.6335	384.164
1,7-Dimethylxanthine			NaN	NaN	NaN		0.253717	0.0355139	13.9975	NaN		0.256239	0.0401533	15.6703	NaN
Creatine			0.7786	0.0509895	6.54887		0.572533	0.178482	31.1741	26.4664		0.865504	0.138071	15.9527	11.1616
3-Hydroxy-3-methylglutarate			NaN	NaN	NaN		0.0425455	0.00519264	12.2049	NaN		0.0394963	0.00650328	16.4655	NaN
Azelate			NaN	NaN	NaN		0.0937727	0.0111581	11.899	NaN		0.0452133	0.00747281	16.5279	NaN
Valine			0.043503	0.00154929	3.56134		0.0473015	0.00378334	7.99835	8.73154		0.0389544	0.0065304	16.7642	10.4559
Lactate			0.0838545	0.00647158	7.71762		0.109855	0.066688	60.7058	31.0061		0.144625	0.0254769	17.6159	72.471
3-Indoxylsulfate			0.241548	0.0142554	5.90169		0.176702	0.0436158	24.6833	26.8463		0.194493	0.0361431	18.5832	19.4806
N-Acetylornithine			NaN	NaN	NaN		0.161289	0.00932819	5.78351	NaN		0.125581	0.0234644	18.6847	NaN
uarm2			0.00500909	0.00136413	27.2331		0.0106152	0.00272447	25.6659	111.918		0.00973049	0.00181919	18.6957	94.2566
ATP			0.0204061	0.00218345	10.7		0.0282431	0.00879124	31.127	38.4055		0.0306985	0.00622277	20.2706	50.438
u072			NaN	NaN	NaN		0.190292	0.110663	58.1543	NaN		0.0706186	0.0147619	20.9036	NaN
Acetate			0.064203	0.00765782	11.9275		0.0404367	0.0119472	29.5455	37.0175		0.0338736	0.00711406	21.0018	47.2398
Ibuprofen			NaN	NaN	NaN		0.0308591	0.00350463	11.3569	NaN		0.0276088	0.00598701	21.6851	NaN
Propylene glycol			0.103285	0.00916911	8.8775		0.15468	0.0193818	12.5302	49.7609		0.116387	0.0263071	22.6032	12.6852
Serotonin			NaN	NaN	NaN		0.198882	0.0885806	44.5393	NaN		0.165637	0.0382663	23.1025	NaN
u1125			NaN	NaN	NaN		0.0540266	0.0594598	110.057	NaN		0.146458	0.0343958	23.4851	NaN
Betaine			0.0871061	0.00661149	7.59016		0.223783	0.204221	91.2584	156.909		0.0773839	0.0194896	25.1856	11.1613
6-Hydroxynicotinate			NaN	NaN	NaN		0.116569	0.0577499	49.5415	NaN		0.0250565	0.00638888	25.4979	NaN
Tropate			NaN	NaN	NaN		0.247339	0.0626899	25.3457	NaN		0.322303	0.0828616	25.7092	NaN
Galactarate			0.028797	0.0177693	61.7053		0.152156	0.0379218	24.9229	428.377		0.133054	0.0342092	25.7108	362.042
Nicotinate			NaN	NaN	NaN		NaN	NaN	NaN	NaN		0.0106158	0.00279733	26.3505	NaN
Methionine			0.0178061	0.00279608	15.703		0.0653879	0.0122653	18.7578	267.223		0.0402294	0.0106893	26.571	125.931
O-Acetylcarnitine			0.0634515	0.00249288	3.9288		0.0644439	0.0204731	31.7688	1.56407		0.053864	0.0143668	26.6724	15.11
uarm1			NaN	NaN	NaN		0.0134227	0.00333366	24.8359	NaN		0.00739061	0.00199404	26.9807	NaN
π-Methylhistidine			0.857985	0.234501	27.3316		0.963189	0.0808706	8.39613	12.2618		0.860896	0.238192	27.6679	0.339261
Histidine			0.6838	0.141271	20.6596		0.649961	0.140843	21.6695	4.94873		0.589661	0.164234	27.8523	13.767
Leucine			0.0269879	0.00260429	9.64987		0.023742	0.00426631	17.9695	12.0272		0.0278439	0.00800753	28.7586	3.17201
Pseudouridine			0.184903	0.0120579	6.52118		0.179735	0.0222323	12.3695	2.79508		0.147486	0.042471	28.7966	20.2359
N-Acetyltyrosine			NaN	NaN	NaN		0.0268569	0.00717847	26.7286	NaN		0.0551261	0.0158825	28.8112	NaN
u14doublet			NaN	NaN	NaN		1.73808	0.630706	36.2876	NaN		1.12789	0.328287	29.1062	NaN
Acetaminophen			NaN	NaN	NaN		NaN	NaN	NaN	NaN		0.0195762	0.00580475	29.652	NaN
2-Oxoglutarate			0.11087	0.013485	12.163		0.172956	0.0303785	17.5643	55.9994		0.222312	0.067021	30.1473	100.516
Isoleucine			0.0126515	0.00103172	8.15493		0.030495	0.00684043	22.4313	141.038		0.0160318	0.00492451	30.7171	26.7187
4-Hydroxyphenyllactate			NaN	NaN	NaN		0.069875	0.0326796	46.7687	NaN		0.114369	0.0360903	31.5562	NaN
Tryptophan			0.0649242	0.00889153	13.6952		0.181958	0.0427358	23.4867	180.262		0.0835391	0.026494	31.7145	28.6716
u87			NaN	NaN	NaN		0.0726397	0.0214024	29.4637	NaN		0.0326527	0.010526	32.2362	NaN
Nicotinic acid adenine dinucleotide			NaN	NaN	NaN		0.0194156	0.00649288	33.4415	NaN		0.012747	0.00415557	32.6003	NaN
Acetoacetate			NaN	NaN	NaN		0.0449574	0.010229	22.7526	NaN		0.0265034	0.0088965	33.5673	NaN
Methanol			0.132055	0.00353934	2.68021		0.0429141	0.0298949	69.6623	67.5028		0.115448	0.039557	34.2639	12.5755
u14			NaN	NaN	NaN		0.0554045	0.0254506	45.936	NaN		0.0649732	0.0224382	34.5346	NaN
Pantothenate			NaN	NaN	NaN		0.0333015	0.00584725	17.5585	NaN		0.0230664	0.00815169	35.34	NaN
Indole-3-acetate			NaN	NaN	NaN		0.236812	0.0280469	11.8435	NaN		0.0670892	0.0239514	35.7008	NaN
Phenylalanine			NaN	NaN	NaN		0.309155	0.0525792	17.0074	NaN		0.289954	0.104287	35.9669	NaN
1,3-Dimethylurate			0.0251818	0.00454391	18.0444		0.0449423	0.0152361	33.9014	78.4713		0.060414	0.0226019	37.4116	139.911
Histamine			NaN	NaN	NaN		0.218515	0.0454324	20.7914	NaN		0.211579	0.0792889	37.4749	NaN
Carnosine			NaN	NaN	NaN		0.338353	0.113	33.397	NaN		0.23707	0.0908746	38.3323	NaN
N-Phenylacetylphenylalanine			NaN	NaN	NaN		NaN	NaN	NaN	NaN		0.0606343	0.0235995	38.9211	NaN
Oxypurinol			NaN	NaN	NaN		0.333994	0.136002	40.7199	NaN		0.382286	0.150955	39.4876	NaN
Succinate			0.0298515	0.00589778	19.7571		NaN	NaN	NaN	NaN		0.0211346	0.00835198	39.518	29.2009
Pyruvate			0.0340606	0.00320312	9.40417		0.025725	0.00954539	37.1055	24.4729		0.022239	0.00883309	39.7189	34.7075
Glucitol			NaN	NaN	NaN		0.404653	0.10516	25.9877	NaN		0.523027	0.20932	40.021	NaN
Glycylproline			NaN	NaN	NaN		0.38687	0.099177	25.6358	NaN		0.210927	0.0848352	40.2202	NaN
4-Hydroxy-3-methoxymandelate			0.0278848	0.00330739	11.8609		0.0757333	0.024387	32.2011	171.593		0.057635	0.0232167	40.2822	106.689
Pyridoxine			NaN	NaN	NaN		0.0273479	0.00721402	26.3787	NaN		0.0286305	0.0117111	40.9043	NaN
Arginine			NaN	NaN	NaN		0.230884	0.0488853	21.1731	NaN		0.118234	0.0490084	41.4504	NaN
2-Aminobutyrate			0.0153242	0.0020267	13.2255		NaN	NaN	NaN	NaN		0.0172046	0.00715084	41.5635	12.2706
2-Furoylglycine			NaN	NaN	NaN		0.209148	0.0401968	19.2193	NaN		0.0383198	0.016693	43.5623	NaN
Maltose			NaN	NaN	NaN		0.442094	0.12142	27.4648	NaN		0.700124	0.312126	44.5815	NaN
u185			NaN	NaN	NaN		NaN	NaN	NaN	NaN		0.0149073	0.00667395	44.7698	NaN
u362			0.040348	0.0130088	32.2415		0.104424	0.0146603	14.0392	158.809		0.04528	0.020688	45.6891	12.2236
Indole-3-lactate			NaN	NaN	NaN		0.135743	0.0414012	30.4997	NaN		0.050175	0.0230203	45.88	NaN
Gluconate			NaN	NaN	NaN		0.37156	0.0831596	22.3812	NaN		0.329308	0.155247	47.1436	NaN
3-Hydroxymandelate			NaN	NaN	NaN		NaN	NaN	NaN	NaN		0.0347961	0.0165418	47.5393	NaN
Mannitol			0.568194	0.0298784	5.25849		0.348459	0.0586773	16.8391	38.6725		0.275304	0.132986	48.3051	51.5476
Sucrose			0.0254939	0.00317657	12.4601		0.165784	0.0453042	27.3272	550.289		0.073487	0.0356585	48.5235	188.253
Galactose			0.071397	0.0107896	15.1121		0.494494	0.112453	22.741	592.598		0.510701	0.252093	49.3621	615.298
N-Phenylacetylglycine			0.525994	0.0383826	7.29716		0.226461	0.0423043	18.6806	56.9462		0.135812	0.0678926	49.99	74.1799
N-Acetylserotonin			NaN	NaN	NaN		NaN	NaN	NaN	NaN		0.0203683	0.0102786	50.4635	NaN
Xylose			NaN	NaN	NaN		0.438364	0.0595071	13.5748	NaN		0.657152	0.334421	50.8894	NaN
Glycolate			0.536691	0.0175768	3.27504		0.516224	0.209012	40.4886	3.81349		0.220713	0.112807	51.1105	58.8752
Tyrosine			0.127242	0.0138517	10.8861		0.149718	0.0299826	20.026	17.6637		0.0899906	0.0461254	51.2558	29.2762
Lysine			0.125391	0.0137414	10.9589		0.150304	0.117407	78.1132	19.8685		0.0660401	0.0341414	51.6979	47.3326
Homovanillate			0.0352212	0.00598993	17.0066		0.0646281	0.0193536	29.9461	83.4921		0.0275804	0.0143472	52.0195	21.6939
Anserine			NaN	NaN	NaN		0.100662	0.0207291	20.5928	NaN		0.144227	0.0772727	53.5772	NaN
Caffeine			0.0219091	0.0097217	44.3729		0.0646258	0.0162034	25.0726	194.973		0.0332501	0.0179121	53.8708	51.7638
Fructose			NaN	NaN	NaN		0.363945	0.118803	32.6431	NaN		0.314661	0.17198	54.6556	NaN
Glucose-6-phosphate			0.340645	0.0270052	7.92764		0.474062	0.15393	32.4704	39.1658		0.602717	0.332084	55.0978	76.9339
Glucose			NaN	NaN	NaN		0.387506	0.101903	26.2971	NaN		0.355749	0.200761	56.4334	NaN
5-Hydroxytryptophan			NaN	NaN	NaN		0.167309	0.0706578	42.2319	NaN		0.0832384	0.046978	56.4379	NaN
1,6-Anhydro-β-D-glucose			0.117921	0.011338	9.6149		0.273391	0.0432536	15.8212	131.842		0.264151	0.151303	57.2789	124.007
Urocanate			0.0178273	0.00258956	14.5258		NaN	NaN	NaN	NaN		0.0126421	0.00726342	57.4544	29.0858
Ascorbate			NaN	NaN	NaN		0.212224	0.0678296	31.9613	NaN		0.36727	0.2208	60.1193	NaN
τ-Methylhistidine			0.291724	0.041851	14.3461		0.364508	0.0294469	8.07853	24.9494		0.195277	0.118582	60.7249	33.0611
Lactose			NaN	NaN	NaN		0.468452	0.131307	28.0299	NaN		0.549021	0.334749	60.972	NaN
4-Aminohippurate			NaN	NaN	NaN		NaN	NaN	NaN	NaN		0.0271556	0.0166627	61.36	NaN
O-Phosphocholine			0.0103758	0.0080121	77.2194		0.043265	0.0188826	43.644	316.982		0.127808	0.0818764	64.0622	1131.79
Carnitine			0.252591	0.0086341	3.41822		0.233461	0.0252988	10.8364	7.57363		0.151206	0.0991521	65.5741	40.1379
3-Hydroxyphenylacetate			0.0203788	0.00281478	13.8123		NaN	NaN	NaN	NaN		0.0141159	0.00939329	66.5441	30.7325
Phenylacetate			0.0742939	0.0109536	14.7436		0.110895	0.0412045	37.1562	49.2655		0.048404	0.032448	67.0357	34.848
Lactulose			0.152961	0.0272465	17.8128		0.255619	0.0736031	28.7941	67.1142		0.171453	0.117341	68.439	12.0897
trans-Aconitate			0.0528788	0.0030763	5.81764		NaN	NaN	NaN	NaN		0.0268553	0.0192198	71.5679	49.2135
Xanthine			NaN	NaN	NaN		0.267666	0.258714	96.6554	NaN		0.263983	0.204049	77.2965	NaN
2-Hydroxyphenylacetate			NaN	NaN	NaN		NaN	NaN	NaN	NaN		0.0132493	0.0128245	96.794	NaN
u361			0.0859613	0.0211701	24.6274		0.05398	0.0140549	26.0372	37.2043		0.0122749	0.0199343	162.399	85.7205
4-Hydroxyphenylacetate			0.118148	0.00850155	7.19565		NaN	NaN	NaN	NaN		0.00481693	0.0102428	212.641	95.923
Mandelate			NaN	NaN	NaN		NaN	NaN	NaN	NaN		0.00135706	0.00354736	261.401	NaN
u433			0.207503	0.0220913	10.6463		0.275102	0.0572425	20.8078	32.5771		NaN	NaN	NaN	NaN
u43			0.00626875	0.000983554	15.6898		0.0103576	0.00233449	22.539	65.2255		NaN	NaN	NaN	NaN
